# Supplementary material for: Technical note: Entrainment-limited kinetics of bimolecular reactions in clouds
Source: Copernicus journal article supplement (doi:10.5194/acp-22-9011-2022), 2022-07-13
Supplement: Supplementary file 1 [file acp-22-9011-2022-supplement.zip]

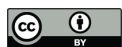

*Supplement of*

## **Technical note: Entrainment-limited kinetics of bimolecular reactions in clouds**

**Christopher D. Holmes**

*Correspondence to:* Christopher D. Holmes ([cdholmes@fsu.edu](mailto:cdholmes@fsu.edu))

- [acp-22-9011-2022-supplement-title-page.pdf](#)
- [CloudBimolecularMethods\\_ACP.py](#)

The copyright of individual parts of the supplement might differ from the article licence.
